# Supplementary material
Source: Elsevier journal article supplement (https://www.sciencedirect.com/science/article/pii/S2530064421000511)

## Figure S1: Probability of a pet catching a bird depending on the total number of pets in a house. Black dots represent observations of bird catches by pets for each house with different numbers of pets. The red line shows the trend in the estimated probability of a pet catching a bird as the number of pets in a house increases.


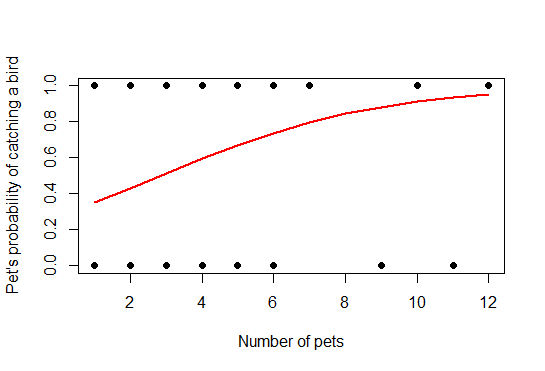

Supplement: mmc1 [file S2530064421000511:mmc1.docx]
